# Supplementary material for: Band gap modulation of Janus graphene nanosheets by interlayer hydrogen bonding and the external electric field: a computational study
Source: Royal Society of Chemistry journal article supplement (doi:10.1039/c5tc00013k), 2015-01-01
Supplement: c5tc00013k1.pdf [file c5tc00013k1.pdf]

**Band Gap Modulation of Janus Graphene Nanosheets by  
Interlayer Hydrogen Bonding and External Electric Field: A  
Computational Study**

*Feng Li,<sup>1</sup> Yafei Li,<sup>\*,1</sup>*

*<sup>1</sup> College of Chemistry and Materials Science, Jiangsu Key Laboratory of  
Biofunctional materials, Nanjing Normal University, Nanjing 210023, China.*

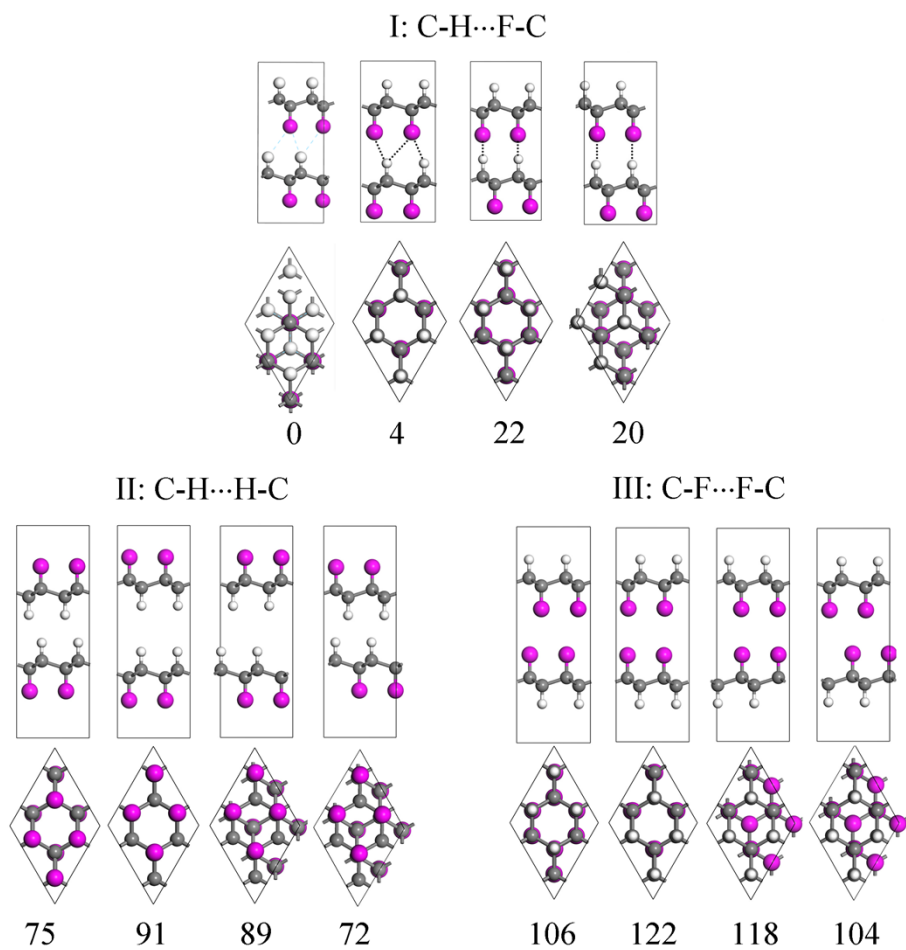

**FIG. S1.** Side (upper) and top (bottom) view of the representative configurations of HGF bilayer in three different stacking patterns with relative energy (in unit of meV/unit cell) to the lowest-energy configuration.

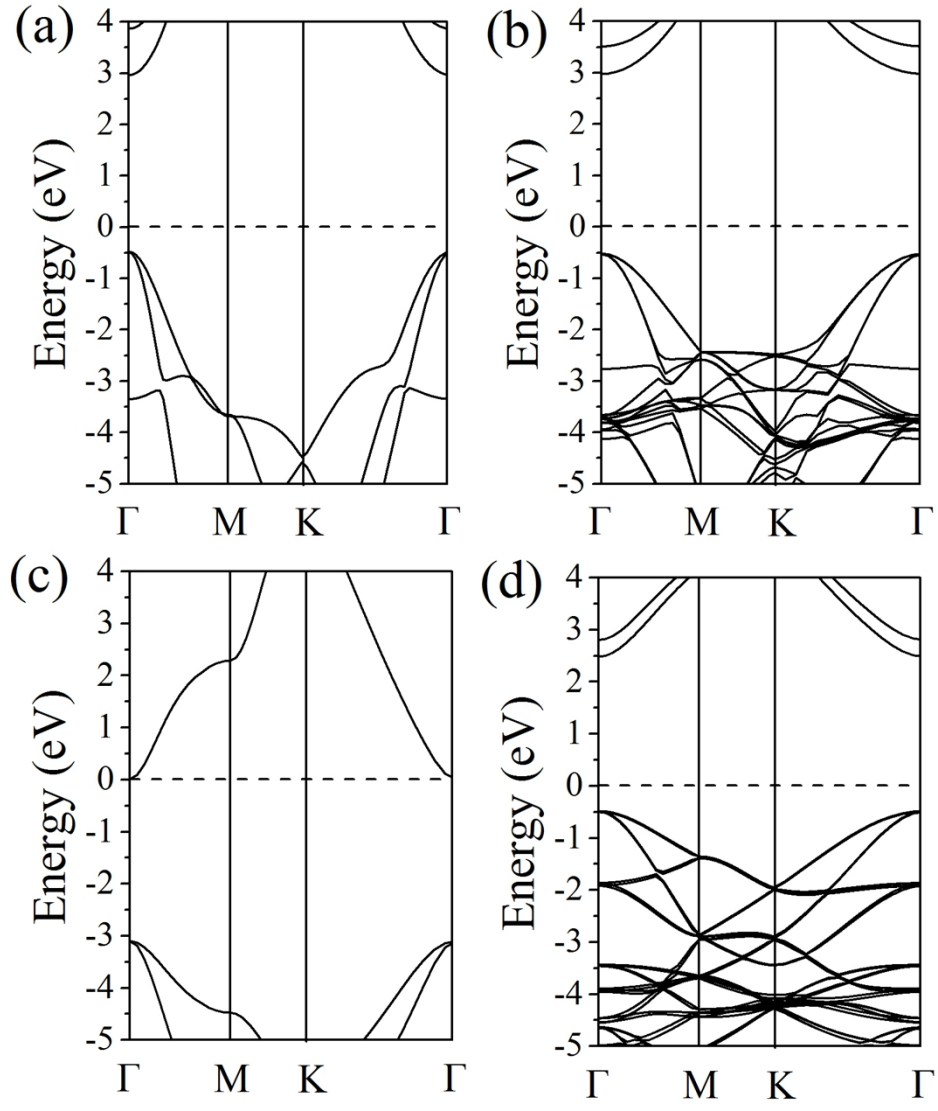

**FIG. S2.** Electronic band structures of (a) graphane monolayer, (b) graphane bilayer, (c) fluorographane monolayer and (d) fluorographane bilayer.
